# Supplementary material for: Straw from Different Crop Species Recruits Different Communities of Lignocellulose-Degrading Microorganisms in Black Soil
Source: MDPI journal article supplement (doi:10.3390/microorganisms12050938), 2024-05-05
Supplement: s1 [file s1]

## Supplementary Figures and Tables

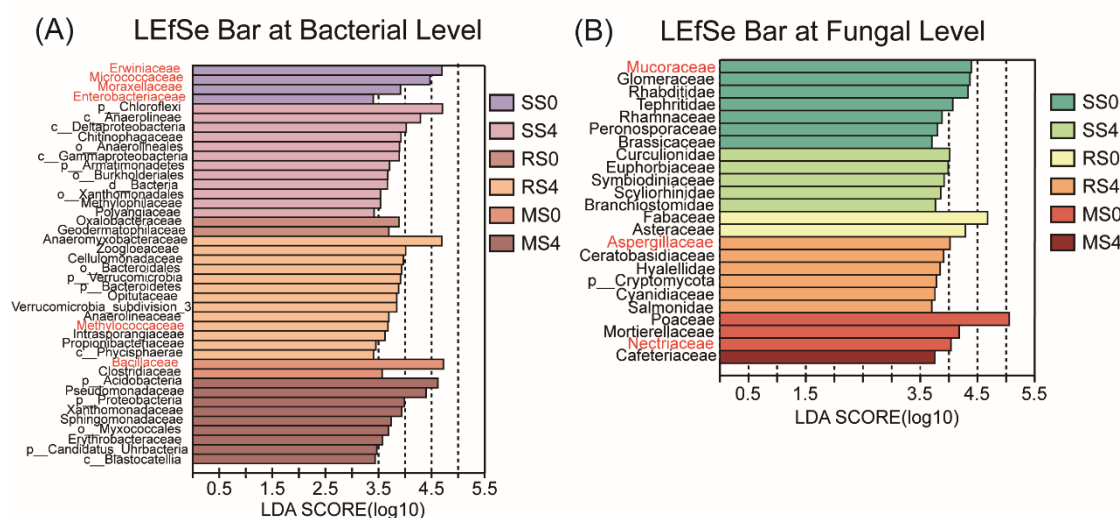

**Figure S1** Linear discriminant analysis effect size (LEfSe) results after 0 and 120 days of straw degradation. (A) LEfSe bar plot at the family level of bacteria (LDA value > 3.4). (B) LEfSe bar plot at the family level of fungi (LDA value > 3.7). SS0, RS0, and MS0 represents degradation time of 0 days for the respective straws, while SS4, RS4 and MS4 represents degradation time of 120 days.

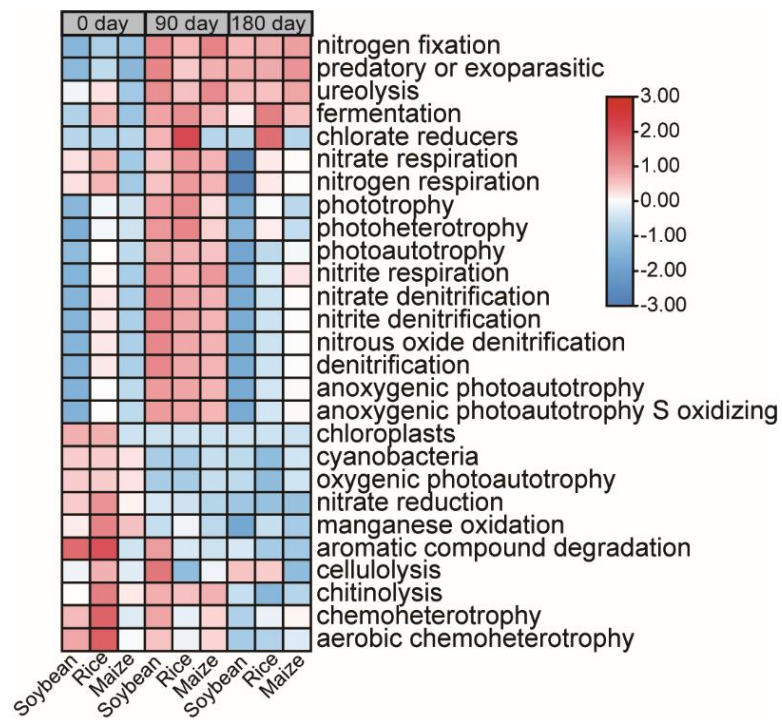

**Figure S2** Functional predictions at the bacteria level using FAPROTAX after 0, 90, and 180 days of straw degradation.

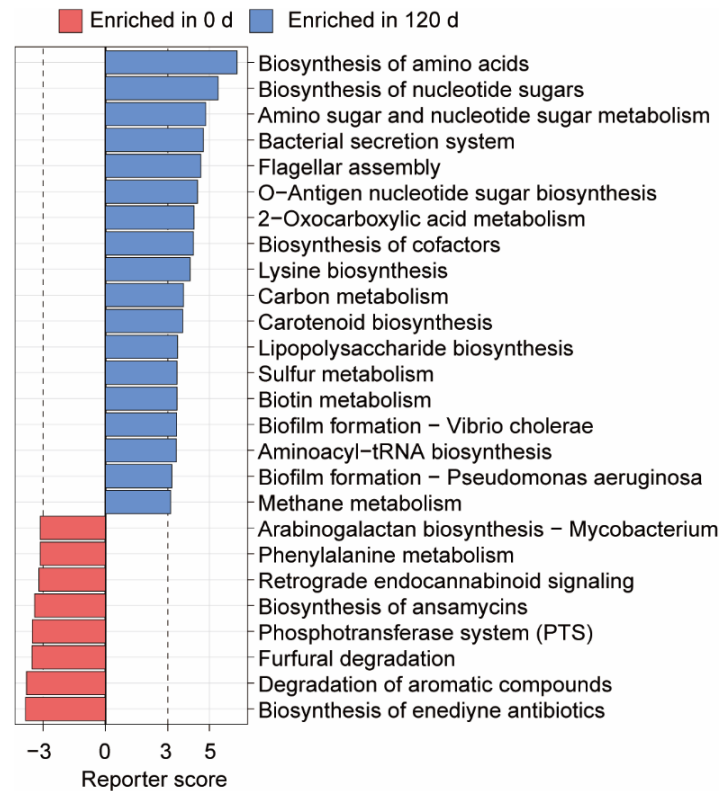

**Figure S3** Comparison of KEGG pathways between 0 and 120 days of crop straw decomposition. The plot displays the reporter score versus  $-\log_{10}P$  value from the hypergeometric test. Vertical dashed lines indicate a reporter score of  $\pm 3$ .

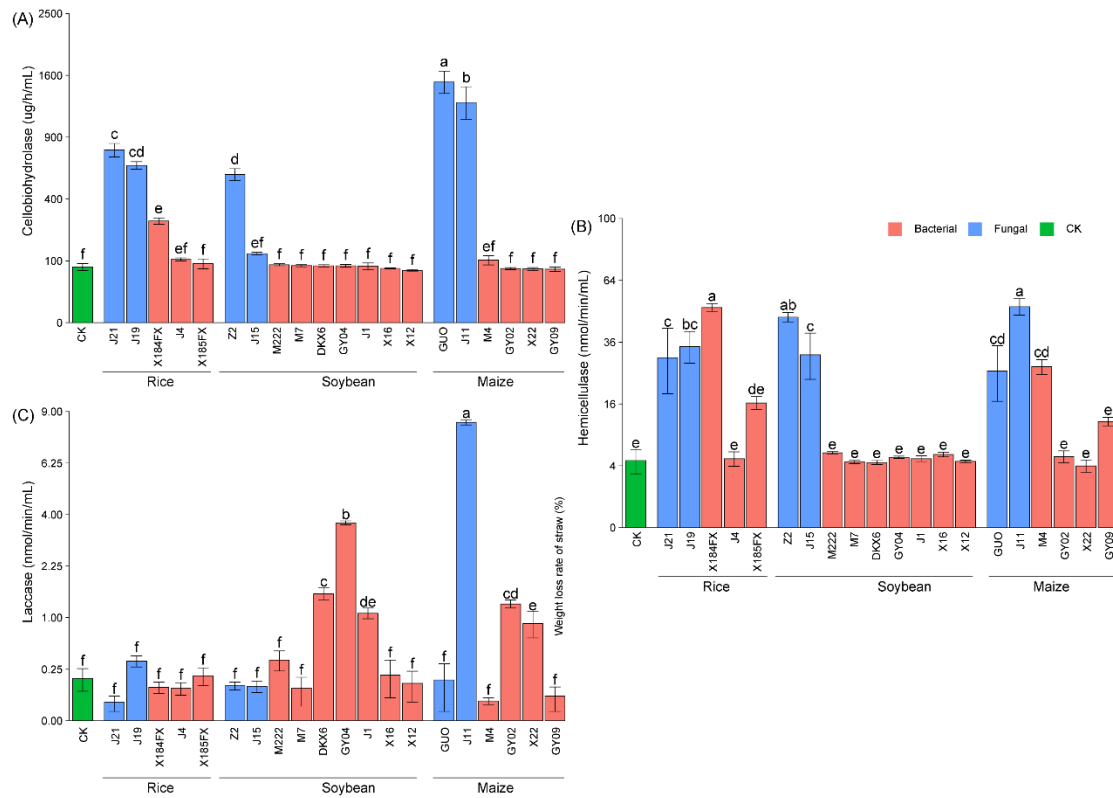

**Figure S4** Determination of enzyme production capacity by different strains. (A) Amount of cellobiohydrolase produced by the strains. (B) Amount of hemicellulase produced by the strains. (C) Amount of laccase produced by the strains. Red indicates fungi, and black indicates bacteria. The different-colored columns represent strains from bacteria and fungi. CK represents sterilized water. Error bars represent standard errors ( $n = 3$ ). Different lowercase letters in the figure indicate significant differences based on Tukey's test ( $p < 0.05$ ).

**Table S1** Detailed information on strains at the bacterial and fungal levels.

| Taxonomy characteristics | Strain name | Species information                | Source of strain       |
|--------------------------|-------------|------------------------------------|------------------------|
| Bacterial                | DKX6        | <i>Glutamicibacter uratoxydans</i> | Soybean straw          |
|                          | GY02        | <i>Priestia megaterium</i>         | Maize straw            |
|                          | GY04        | <i>Klebsiella pneumoniae</i>       | Soybean straw          |
|                          | GY09        | <i>Bacillus velezensis</i>         | Maize straw            |
|                          | M4          | <i>Bacillus altitudinis</i>        | Maize straw            |
|                          | M7          | <i>Pantoea agglomerans</i>         | Soybean straw          |
|                          | M222        | <i>Enterobacter hormaechei</i>     | Soybean and Rice straw |
|                          | X12         | <i>Pantoea vagans</i>              | Soybean straw          |
|                          | X16         | <i>Acinetobacter NGCT_s</i>        | Soybean straw          |
|                          | X22         | <i>Bacillus altitudinis</i>        | Maize straw            |
|                          | X184FX      | <i>Streptomyces daghestanicus</i>  | Rice straw             |
|                          | X185FX      | <i>Streptomyces albidoflavus</i>   | Rice straw             |
| Fungal                   | GUO         | <i>Fusarium longipes</i>           | Maize straw            |
|                          | J11         | <i>Fusarium sp.</i>                | Maize straw            |
|                          | J15         | <i>Mucor circinelloides</i>        | Soybean straw          |
|                          | J19         | <i>Aspergillus sp.</i>             | Rice straw             |
|                          | J21         | <i>Aspergillus fumigatus</i>       | Rice straw             |
|                          | Z-2         | <i>Mucor circinelloides</i>        | Soybean straw          |

**Table S2** Strains comprising six synthetic microbial communities (Syncoms).

| Synthetic microbial communities<br>(SynComs) | Species information                                                                                                                    |
|----------------------------------------------|----------------------------------------------------------------------------------------------------------------------------------------|
| SynCom1                                      | <i>Aspergillus</i> sp. J19<br><i>Fusarium</i> sp. J11<br><i>Fusarium longipes</i> GUO<br><i>Mucor circinelloides</i> J15               |
| SynCom2                                      | <i>Fusarium</i> sp. J11<br><i>Streptomyces daghestanicus</i> X184FX<br><i>Mucor circinelloides</i> Z-2                                 |
| SynCom3                                      | <i>Aspergillus</i> sp. J19<br><i>Fusarium longipes</i> GUO<br><i>Fusarium</i> sp. J11<br><i>Aspergillus fumigatus</i> J21              |
| SynCom4                                      | <i>Aspergillus</i> sp. J19<br><i>Fusarium</i> sp. J11<br><i>Klebsiella pneumoniae</i> GY04<br><i>Glutamicibacter uratoxydans</i> DKX6  |
| SynCom5                                      | <i>Priestia megaterium</i> GY02<br><i>Fusarium longipes</i> GUO<br><i>Mucor circinelloides</i> Z-2<br><i>Aspergillus fumigatus</i> J21 |
| SynCom6                                      | <i>Mucor circinelloides</i> J15<br><i>Aspergillus</i> sp. J19<br><i>Fusarium</i> sp. J11<br><i>Fusarium longipes</i> GUO               |
